# Supplementary material
Source: publisher figshare collection journal article supplement (https://gsajournals.figshare.com/ndownloader/files/22867304)
Supplement: Supplementary file 1 [file 22867304]

Table S1. Primer sequences

| Primer name | Sequence |
| --- | --- |
| Of-w-exon2-guideA | TTAATACGACTCACTATAGGTTTTCGATAACGGTCTCCAGGTTTTAGAGCTAGAAATAG |
| Of-w-exon2-guideB | TTAATACGACTCACTATAGGGACCCTGGCAAGGCTCAGGTTTTAGAGCTAGAAATAG |
| Of-w-exon2-guideC | TTAATACGACTCACTATAGGCGCTTCTGTTCAGTCTGTTTTAGAGCTAGAAATAG |
| gRNArev | AAAAGCACCGACTCGGTGCC |
| Of-w-exon2-64-F | GTGAGGTATATTACTGGATGTGCCAAATTTCTTG |
| Of-w-exon2-211-R | GATGAGAGCAGGAGTGCTGACAGGATTAG |
| Of-w-RNAi-FT7 | taatacgactcactatagggagaGCTGCATGTCCGAGTAACTACAAC |
| Of-w-RNAi-RT7 | taatacgactcactatagggagaCATTCCATTCATGTGCTCTCGC |
| Of-w-exon1-UTR-F | GGACTTGGTGACAGTGCTTGACTTC |
| Of-w-R-1 | GTGTTTGACCGGCTGCATGTAATG |
